# Supplementary material for: Ni–N synergy enhanced the synthesis of formic acid via CO2 hydrogenation under mild conditions
Source: Royal Society of Chemistry journal article supplement (doi:10.1039/d3gc01873c), 2023-01-01
Supplement: d3gc01873c1.pdf [file d3gc01873c1.pdf]

## Supporting Information

Ni-N synergy enhanced synthesis of formic acid via CO<sub>2</sub> hydrogenation under mild condition

Jyotishman Kaishyop<sup>a,b</sup>, Tuhin Suvra Khan<sup>a,b</sup>, Satyajit Panda<sup>a,b</sup>, Chandewar Pranay Rajendra<sup>c</sup>, Debaprashad Shee<sup>c</sup>, Tulio C. R. Rocha<sup>d</sup>, Flavio C. Vicentin<sup>d</sup>, Ankur Bordoloi<sup>a,b,\*</sup>

[a] Light Stock Processing Division

CSIR-Indian Institute of Petroleum

Mohkampur, Haridwar road, Dehradun, Uttarakhand – 248005

[b] Academy of Scientific and Innovative Research (AcSIR)

Ghaziabad- 201002, India

[c] Department of Chemical Engineering

Indian Institute of Technology Hyderabad

Kandi, Telangana – 502284

[d] Brazilian Synchrotron Light Laboratory (LNLS),

Brazilian Center for Research on Energy and Materials (CNPEM), 13083-100, Brazil

## Table of Contents

|                  |                                                                                                                                                                                                                                                |   |
|------------------|------------------------------------------------------------------------------------------------------------------------------------------------------------------------------------------------------------------------------------------------|---|
| <b>Table S1</b>  | The amount of CO <sub>2</sub> desorbed in the CO <sub>2</sub> -TPD experiment .....                                                                                                                                                            | 3 |
| <b>Table S2</b>  | Catalytic recyclability of 1Ni/N-TiO <sub>2</sub> .....                                                                                                                                                                                        | 3 |
| <b>Table S3</b>  | The representation of deviation in CO <sub>2</sub> hydrogenation for 1Ni/N-TiO <sub>2</sub> catalyst .....                                                                                                                                     | 3 |
| <b>Figure S1</b> | Raman spectrum .....                                                                                                                                                                                                                           | 4 |
| <b>Figure S2</b> | H <sub>2</sub> TPR profile.....                                                                                                                                                                                                                | 5 |
|                  | CO <sub>2</sub> adsorption isotherm .....                                                                                                                                                                                                      | 6 |
| <b>Figure S3</b> | CO <sub>2</sub> adsorption isotherm at 1 bar and 298 K .....                                                                                                                                                                                   | 6 |
| <b>Figure S4</b> | DFT optimised structure of (a) Ni <sub>13</sub> /2N-TiO <sub>2</sub> (101) surface (b) Ni <sub>13</sub> /4N-TiO <sub>2</sub> (101) surface, and (c) Ni <sub>13</sub> /6N-TiO <sub>2</sub> (101) surface .....                                  | 7 |
|                  | Effect of nitrogen content on CO <sub>2</sub> adsorption .....                                                                                                                                                                                 | 7 |
| <b>Figure S5</b> | DFT optimised geometry of the CO <sub>2</sub> adsorption at (a) Ni <sub>13</sub> /2N-TiO <sub>2</sub> (101) surface (b) Ni <sub>13</sub> /4N-TiO <sub>2</sub> (101) surface, and (c) Ni <sub>13</sub> /6N-TiO <sub>2</sub> (101) surface ..... | 8 |

**Table S1:** The amount of CO<sub>2</sub> desorbed in the CO<sub>2</sub>-TPD experiments.

| Sl. No. | Catalysts                | CO <sub>2</sub> Desorbed (cm <sup>3</sup> /g STP) |              |      |        | CO <sub>2</sub> uptake capacity (mmol/g) | Conversion (%) |
|---------|--------------------------|---------------------------------------------------|--------------|------|--------|------------------------------------------|----------------|
|         |                          | Weak                                              | Intermediate | High | Total  |                                          |                |
| 1       | 2.5Ni/N-TiO <sub>2</sub> | 0.1367                                            | 0.0834       | -    | 0.2201 | 0.3                                      | 9.6            |
| 2       | 1.0Ni/N-TiO <sub>2</sub> | 0.0927                                            | 0.1384       | -    | 0.2311 | 0.39                                     | 11.29          |
| 3       | 0.5Ni/N-TiO <sub>2</sub> | 0.1535                                            | 0.0587       | -    | 0.2122 | 0.24                                     | 7.79           |
| 4       | 1.0Ni/TiO <sub>2</sub>   | 0.2062                                            | 0            | -    | 0.2062 | 0.23                                     | 7.39           |

**Table S2:** Catalytic recyclability of 1Ni/N-TiO<sub>2</sub> catalyst

| Cycle   | Conversion (%) | TON |
|---------|----------------|-----|
| Cycle 1 | 11.29          | 757 |
| Cycle 2 | 11.28          | 755 |
| Cycle 3 | 11.26          | 752 |
| Cycle 4 | 11.25          | 749 |

Reaction condition: Catalyst amount: 100 mg, Solvent: H<sub>2</sub>O, Temperature: 353 K, Pressure: 60 bar, Time: 20 h

**Table S3:** The representation of deviation in CO<sub>2</sub> hydrogenation for 1Ni/N-TiO<sub>2</sub> catalyst

| Batch              | Conversion (%) | TON  |
|--------------------|----------------|------|
| Batch 1            | 11.29          | 757  |
| Batch 2            | 11.28          | 755  |
| Batch 3            | 11.17          | 750  |
| Batch 4            | 11.27          | 754  |
| Average            | 11.25          | 754  |
| Standard deviation | 0.06           | 2.94 |

Reaction condition: Catalyst amount: 100 mg, Solvent: H<sub>2</sub>O, Temperature: 353 K, Pressure: 60 bar, Time: 20 h

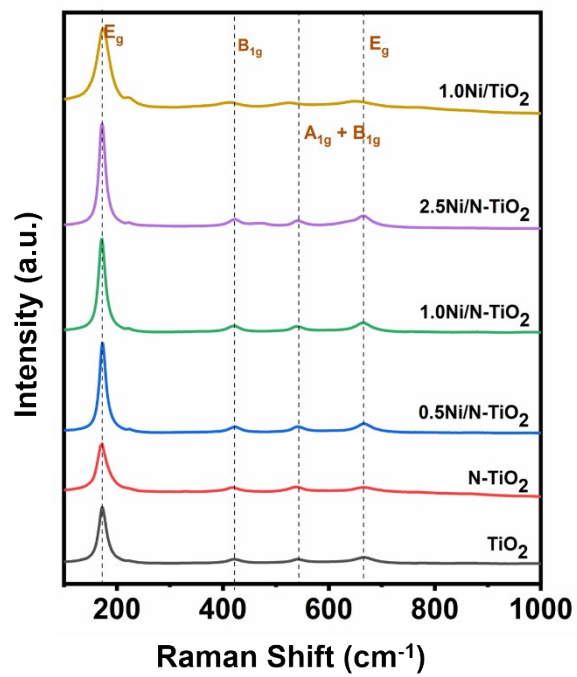

Figure S1: Raman Spectrum

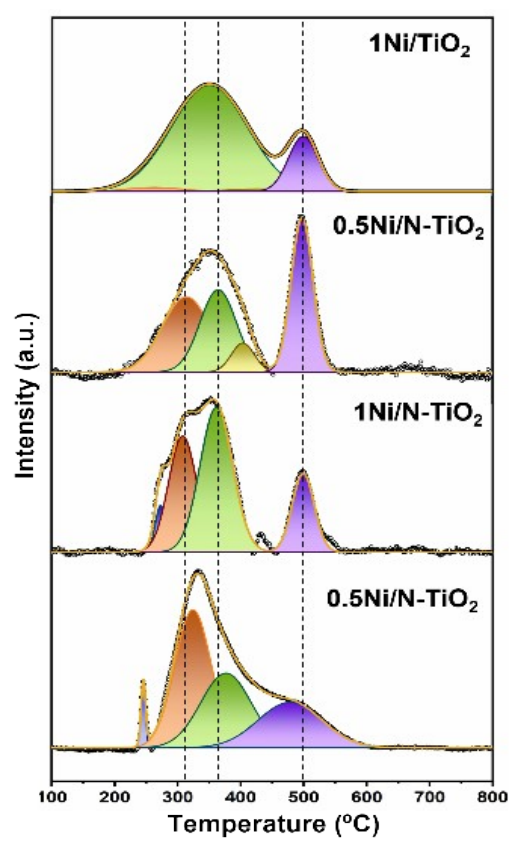

Figure S2: H<sub>2</sub>-TPR profile

### CO<sub>2</sub> adsorption isotherm

The CO<sub>2</sub> adsorption performance of as-prepared catalysts, including 2.5Ni/N-TiO<sub>2</sub>, 1Ni/N-TiO<sub>2</sub>, 0.5Ni/N-TiO<sub>2</sub>, and 1Ni/TiO<sub>2</sub>, were studied at 1 bar pressure and 298 K temperature, as shown in Fig. S3. Remarkably, the 1Ni/N-TiO<sub>2</sub> catalyst showed highest adsorption capacity of 0.39 mmol per g of catalyst, followed by 2.5 Ni/N-TiO<sub>2</sub> catalyst with adsorption capacity of 0.3 mmol/g. The lower adsorption capacity of 2.5 Ni/N-TiO<sub>2</sub> compared to 1Ni/N-TiO<sub>2</sub> is due to a lower surface area caused by higher metal loading. The 0.5 Ni/N-TiO<sub>2</sub> catalyst exhibits an adsorption capacity of 0.24 mmol/g, whereas the N-undoped 1Ni/TiO<sub>2</sub> possesses an adsorption capacity of 0.23 mmol/g at standard temperature and pressure. It has been observed that CO<sub>2</sub> adsorbs strongly on 1Ni/N-TiO<sub>2</sub> as compared to 1Ni/TiO<sub>2</sub>. These findings are in accordance with the DFT-predicted CO<sub>2</sub> adsorption behaviour as CO<sub>2</sub> adsorbs on Ni<sub>13</sub>/N-TiO<sub>2</sub> (101) surface with a binding energy of -0.73 eV; whereas the binding energy of CO<sub>2</sub> on Ni<sub>13</sub>/TiO<sub>2</sub> was calculated to be -0.50 eV.

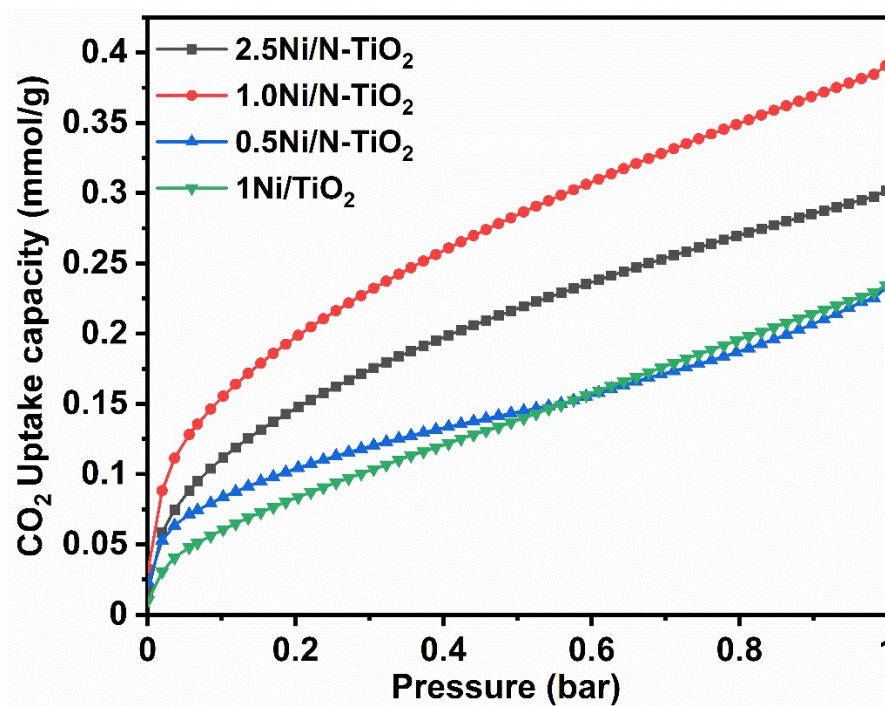

Figure S3: CO<sub>2</sub> adsorption isotherm at 1 bar and 298 K

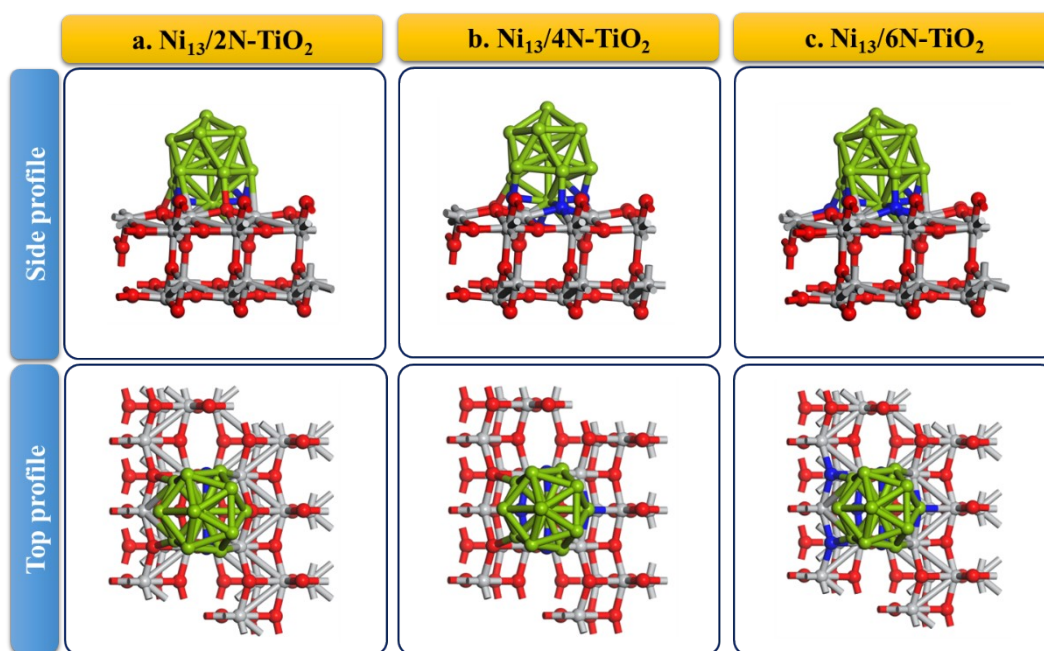

**Figure S4:** The DFT optimised structure of (a) Ni<sub>13</sub>/2N-TiO<sub>2</sub> (101) surface (b) Ni<sub>13</sub>/4N-TiO<sub>2</sub> (101) surface, and (c) Ni<sub>13</sub>/6N-TiO<sub>2</sub> (101) surface Color code: Green: Nickel, Blue: Nitrogen, Gray: Titanium, and Red: Oxygen

#### Effect of Nitrogen content on CO<sub>2</sub> adsorption

The adsorption characteristics of CO<sub>2</sub> species on the Ni<sub>13</sub>/2N-TiO<sub>2</sub> (101) surface and Ni<sub>13</sub>/6N-TiO<sub>2</sub> (101) surface were investigated, employing the same calculation parameters set for the other calculations in the manuscript. Fig. S5 (a) shows that CO<sub>2</sub> was adsorbed on the Ni<sub>13</sub>/2N-TiO<sub>2</sub> (101) surface in a bend configuration by forming three bonds, one of which the 'O' atom of CO<sub>2</sub> bonded to a Ni atom with a bond length of 2.09 Å and the rest of 'C' and 'O' atoms were together bonded to a neighbouring Ni atom possessing a bond length of 1.89 Å and 2.19 Å, respectively. The binding energy calculated for CO<sub>2</sub> on Ni<sub>13</sub>/2N-TiO<sub>2</sub> was -0.55 eV, slightly higher exothermic than Ni<sub>13</sub>/TiO<sub>2</sub> by 0.05 eV, which possesses binding energy of -0.50 eV. However, the stability of CO<sub>2</sub> on the Ni<sub>13</sub>/2N-TiO<sub>2</sub>(101) surface was very close to the Ni<sub>13</sub>/TiO<sub>2</sub> as compared to Ni<sub>13</sub>/4N-TiO<sub>2</sub>, which exhibits a binding energy of -0.73 eV. CO<sub>2</sub> was observed to be adsorbed on Ni<sub>13</sub>/6N-TiO<sub>2</sub> (101) surface through the formation of three bonds in a similar manner in the case of Ni<sub>13</sub>/2N-TiO<sub>2</sub>, as can be seen in Fig. S5 (c). The bond length of the O-Ni bond was measured to be 2.06 Å, whereas the C-Ni bond and O-Ni bonds were calculated to be 1.88 Å and 2.23 Å, respectively. The binding energy of CO<sub>2</sub> on the Ni<sub>13</sub>/6N-TiO<sub>2</sub> was computed to be -0.81 eV. It was observed that the binding energy of CO<sub>2</sub> was increased with the increase in the number of N atoms following the trend: Ni<sub>13</sub>/TiO<sub>2</sub> (-0.5 eV) < Ni<sub>13</sub>/2N-TiO<sub>2</sub> (-0.55 eV) < Ni<sub>13</sub>/4N-TiO<sub>2</sub> (-0.73 eV) < Ni<sub>13</sub>/6N-TiO<sub>2</sub> (-0.81 eV). This study reveals that the increasing number of N atoms enhances the basicity of the catalyst surface, due to which the acid-base interaction between the basic catalyst surface and the acidic CO<sub>2</sub> has increased, resulting in the stable adsorption of CO<sub>2</sub>. However, if compared to Ni<sub>13</sub>/TiO<sub>2</sub>

surface, the adsorption of the CO<sub>2</sub> species was slightly exothermic by 0.05 eV on Ni<sub>13</sub>/2N-TiO<sub>2</sub> surface, whereas it was significantly more exothermic on the Ni<sub>13</sub>/4N-TiO<sub>2</sub> surface by 0.23 eV. Further increasing the number of N atoms on the Ni<sub>13</sub>/4N-TiO<sub>2</sub> surface makes the CO<sub>2</sub> adsorption process higher exothermic. Nevertheless, the CO<sub>2</sub> adsorbs on Ni<sub>13</sub>/6N-TiO<sub>2</sub> surface with a small increment of binding energy than Ni<sub>13</sub>/4N-TiO<sub>2</sub> surface by 0.08 eV, relatively very close to Ni<sub>13</sub>/4N-TiO<sub>2</sub> surface.

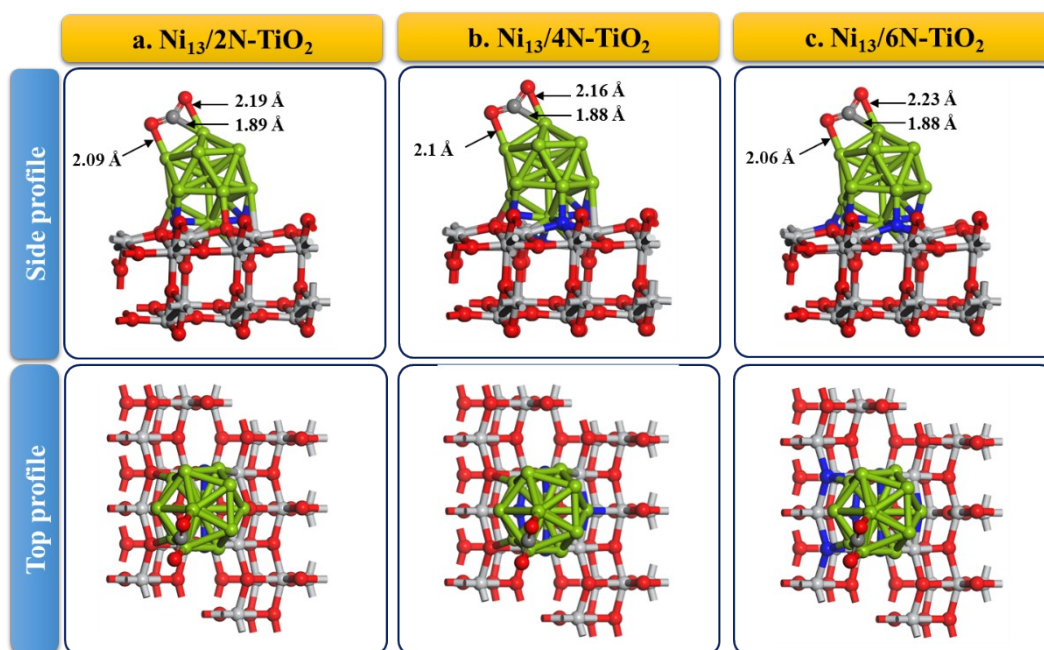

**Figure S5:** The DFT optimised geometry of the CO<sub>2</sub> adsorption at (a) Ni<sub>13</sub>/2N-TiO<sub>2</sub> (101) surface (b) Ni<sub>13</sub>/4N-TiO<sub>2</sub> (101) surface, and (c) Ni<sub>13</sub>/6N-TiO<sub>2</sub> (101) surface Color code: Green: Nickel, Blue: Nitrogen, Gray: Titanium, Dark Gray: Carbon and Red: Oxygen

The stable configuration of the Ni<sub>13</sub>/6N-TiO<sub>2</sub> model possesses no Ni-O bonding, as shown in Fig. 1 (c), which is not supported by catalyst characterization evidence, as discussed earlier. In contrast, Ni<sub>13</sub>/4N-TiO<sub>2</sub> exhibited a significant enhancement in CO<sub>2</sub> bind energy than Ni<sub>13</sub>/TiO<sub>2</sub>, along with supporting the characterization data. Therefore, Ni<sub>13</sub>/4N-TiO<sub>2</sub> was chosen to represent 1Ni/N-TiO<sub>2</sub> catalyst for further DFT calculations.
